# Supplementary material
Source: publisher figshare collection journal article supplement (https://acs.figshare.com/ndownloader/files/20187879)
Supplement: Supplementary file 1 [file 20187879]

## Supplementary data

### **A Novel Nopinone-based Turn-on Fluorescent Probe for Hydrazine in Living Cells with High Selectivity**

Mingxin Li,<sup>†</sup> Jinfa He,<sup>†</sup> Zhonglong Wang,<sup>†</sup> Qian Jiang,<sup>†</sup> Haiyan Yang,<sup>†</sup> Jie Song,<sup>§</sup>  
Yiqin Yang,<sup>‡, †</sup> Xu Xu,<sup>†, †</sup> and Shifa Wang,<sup>†, †, \*</sup>

<sup>†</sup>*College of Chemical Engineering, Nanjing Forestry University, Nanjing, Jiangsu  
210037, P. R. China.*

<sup>‡</sup>*College of Light Industry and Food, Nanjing Forestry University, Nanjing, Jiangsu  
210037, P. R. China.*

<sup>§</sup>*Department of Chemistry and Biochemistry, University of Michigan-Flint, Flint, MI  
48502, USA.*

<sup>†</sup>*Co-innovation Center of Efficient Processing and Utilization of Forest Resources,  
Nanjing Forestry University, Nanjing, 210037, P. R. China.*

<sup>\*</sup>Corresponding author: Dr. and Prof. Shifa Wang

Tel.: +86-25-85428369; Fax: +86-25-85428369

E-mail: wangshifa65@163.com

## Figure Captions.

**Fig. S1.** HRMS of compound **2**, compound **3** and probe **4**.

**Fig. S2.**  $^1\text{H}$  and  $^{13}\text{C}$  NMR spectra of compound **2**.

**Fig. S3.**  $^1\text{H}$  and  $^{13}\text{C}$  NMR spectra of compound **3**.

**Fig. S4.**  $^1\text{H}$  and  $^{13}\text{C}$  NMR spectra of probe **4**.

**Fig. S5.** MTT assay of Hela cells were incubated with 60, 80, 100, 120 and 150  $\mu\text{M}$  probe **4** for 24 h.

**Fig. S6.** Time-dependent fluorescence changes of probe **4** (100  $\mu\text{M}$ ) upon addition of  $\text{N}_2\text{H}_4$  (900  $\mu\text{M}$ ). ( $\lambda_{\text{ex}}$  = 300 nm,  $\lambda_{\text{em}}$  = 442nm).

**Fig. S7.** Absorption changes of Probe **4** (100  $\mu\text{M}$ ) with  $\text{N}_2\text{H}_4$  (0-600 $\mu\text{M}$ ). All data were measured after 30 min of pretreatment of Probe **4** with  $\text{N}_2\text{H}_4$  in ethanol/ $\text{H}_2\text{O}$  (1/1, v/v) (10 mM phosphate buffer solution, pH = 7.4).

**Fig. S8.** Fluorescence emission spectra of Probe **4** (100  $\mu\text{M}$ ) before (black line) and after (red line) the addition of  $\text{N}_2\text{H}_4$  (400  $\mu\text{M}$ ). ( $\lambda_{\text{ex}}$  = 300 nm,  $\lambda_{\text{em}}$  = 442nm).

**Fig. S9.** Absorption spectra of Probe **4** (100  $\mu\text{M}$ ) in the absence and presence of 600  $\mu\text{M}$  hydrazine and Compound **3** in ethanol/ $\text{H}_2\text{O}$  (1/1, v/v) (10 mM phosphate buffer solution, pH = 7.4).

**Fig. S10.** MTT assay of Hela cells were incubated with 0.2, 0.4, 0.6 and 0.8 M hydrazine for 12 and 24 h.

**Fig. S11.** Fluorescence spectra of 10, 20, 40, 60, 80 and 100 $\mu\text{M}$  Probe **4** before (black bar) and after (red bar) the addition of 9 equiv.  $\text{N}_2\text{H}_4$ .

**Table S1.** Comparison of probe **4** with other hydrazine probes.

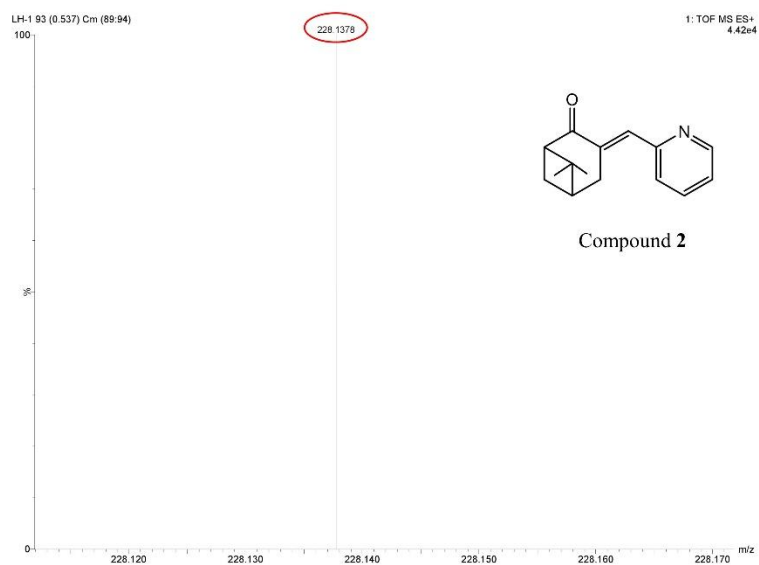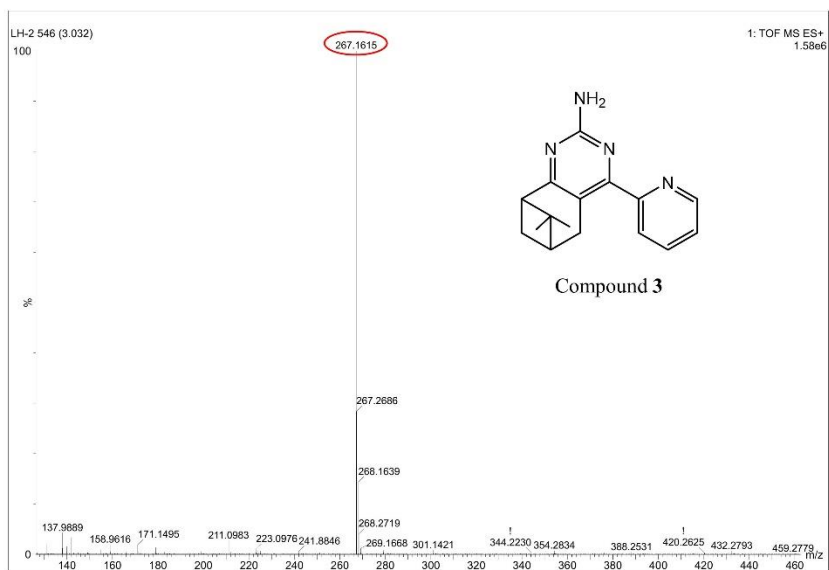

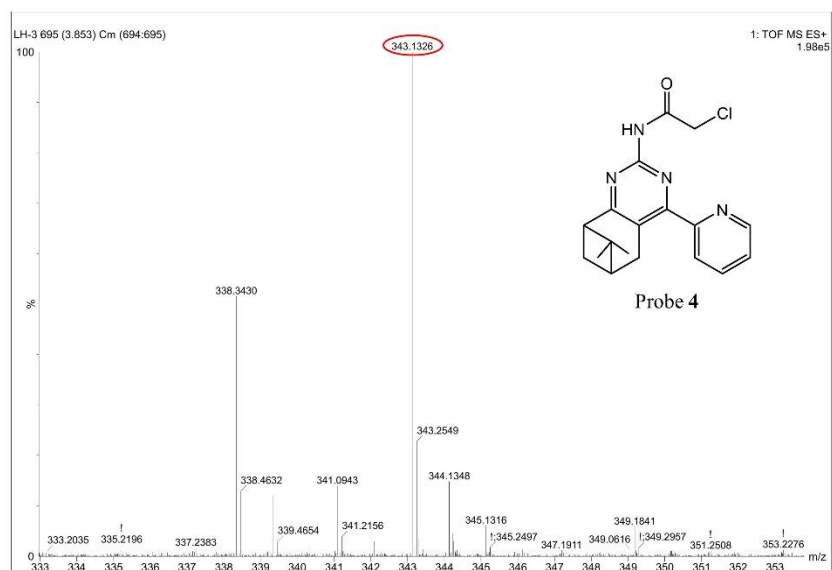

**Fig. S1**

Compound 2

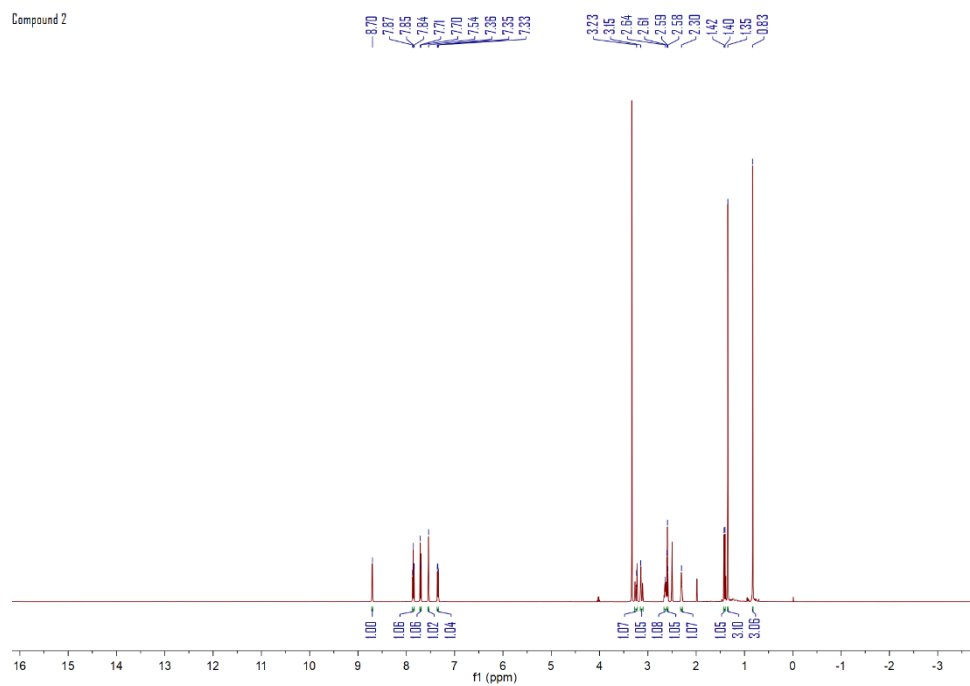

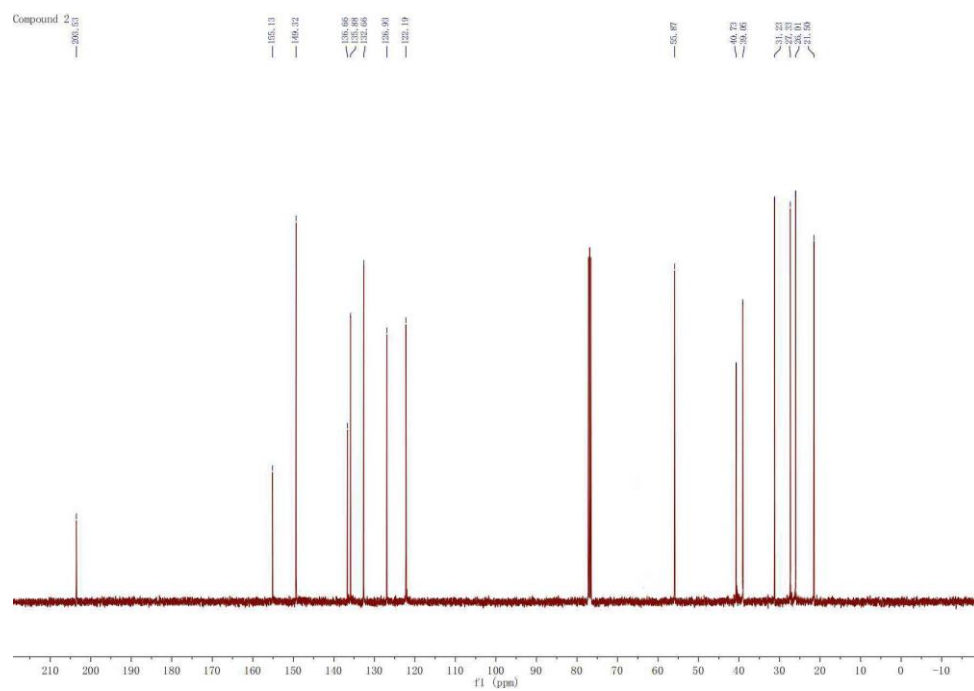

Fig. S2

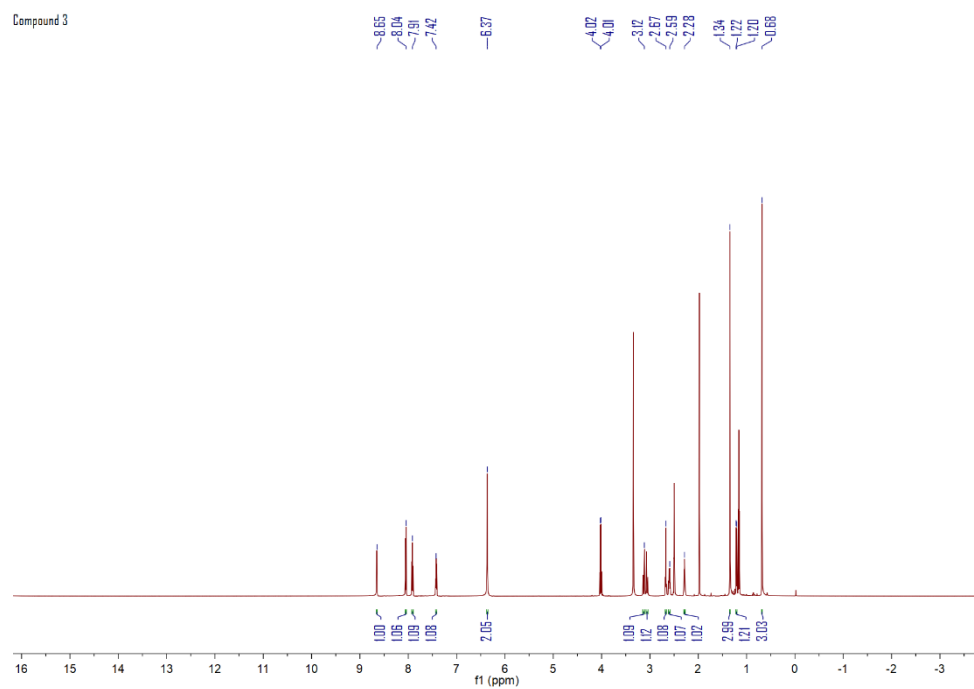

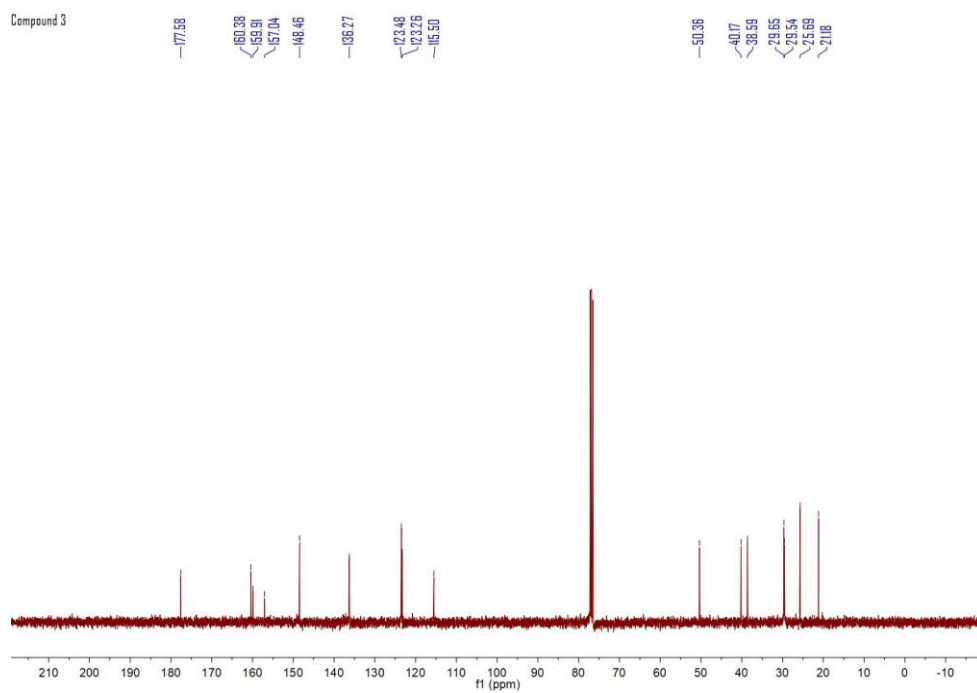

Fig. S3

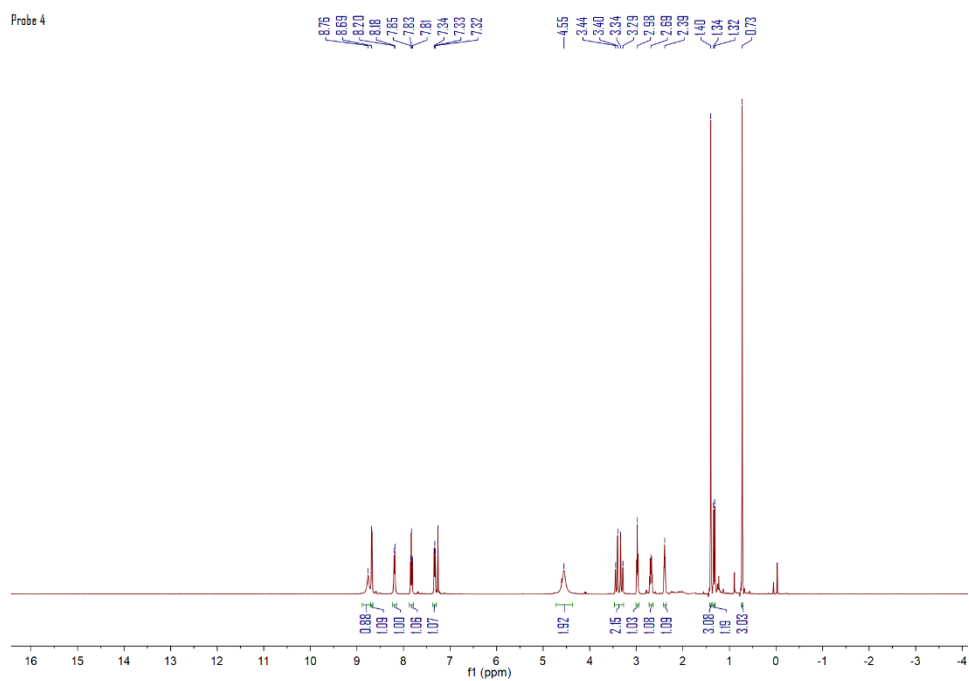

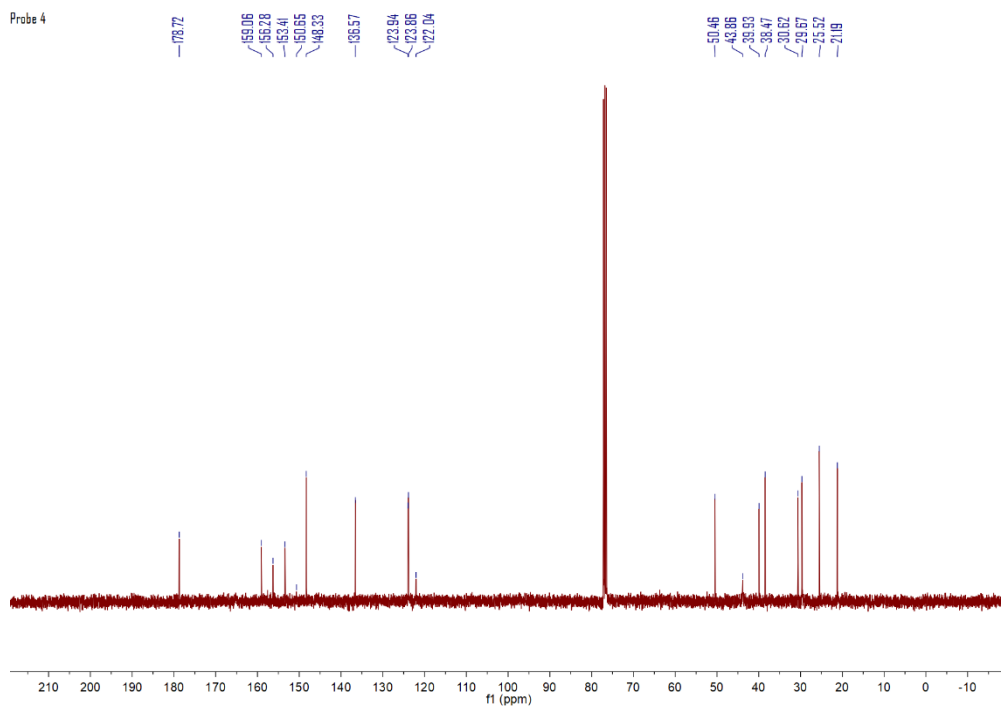

**Fig. S4**

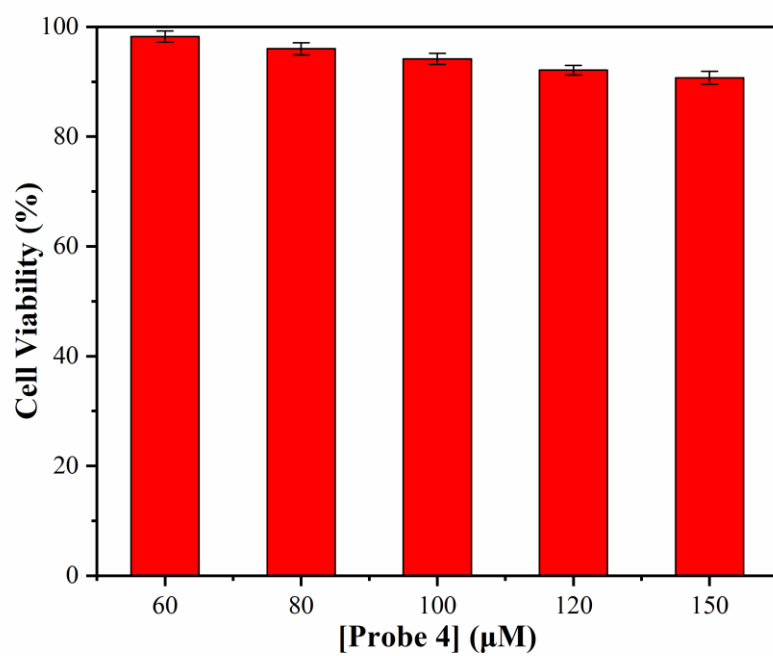

**Fig. S5**

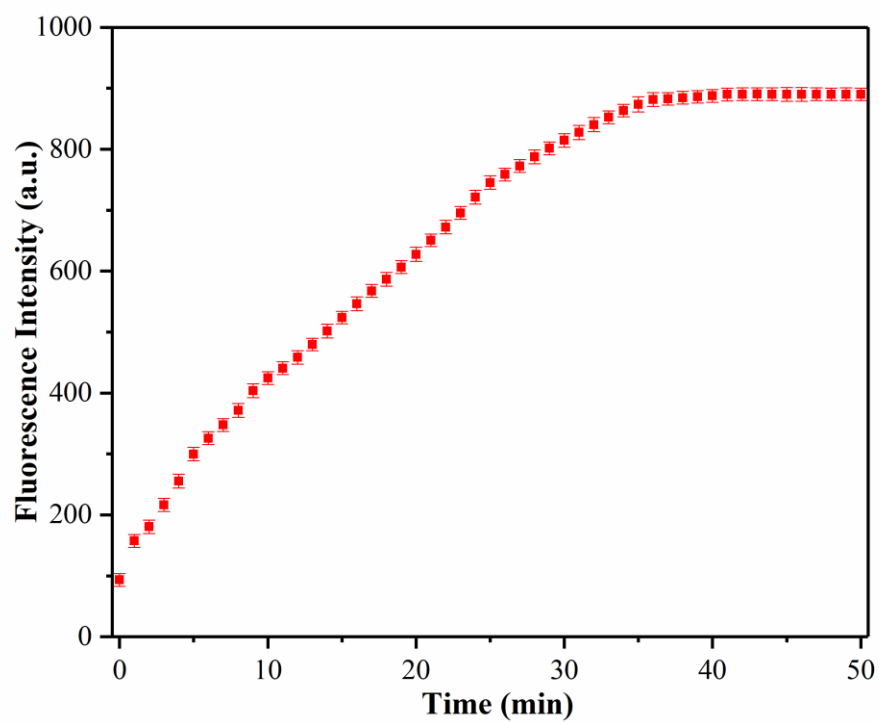

Fig. S6

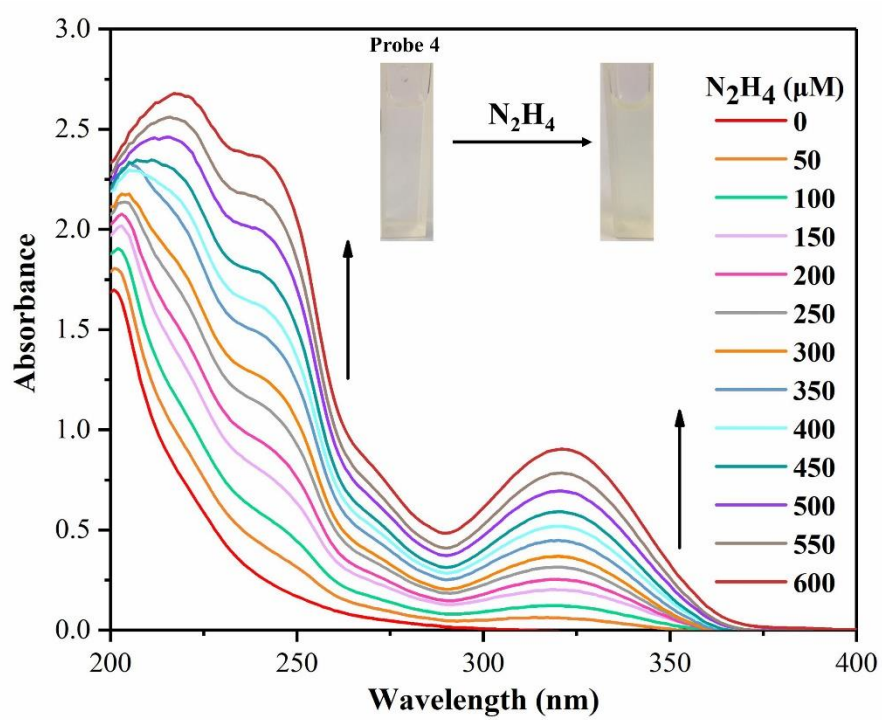

Fig. S7



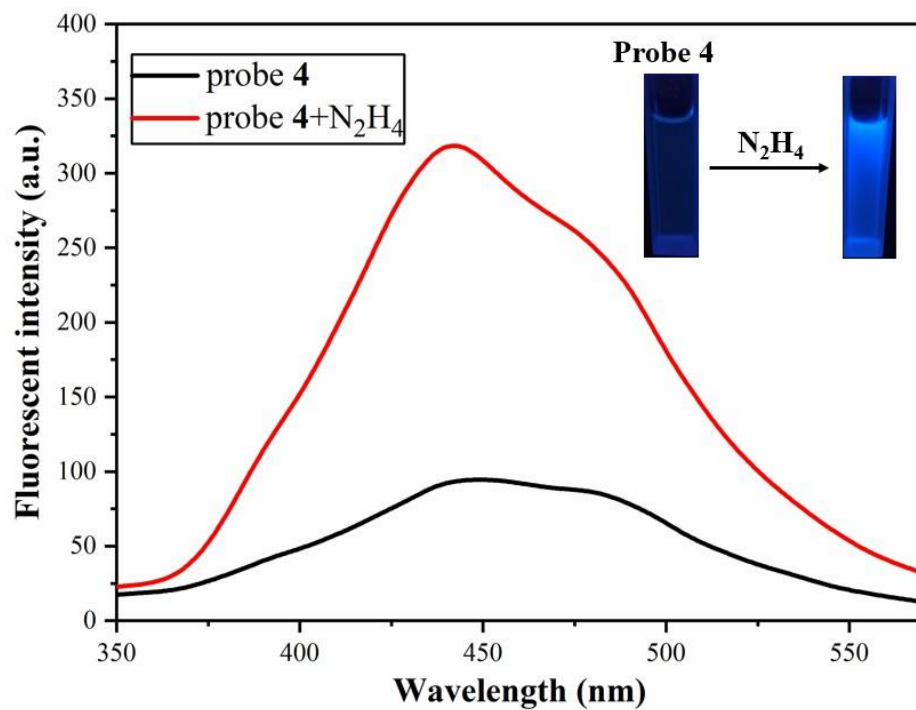

Fig. S8

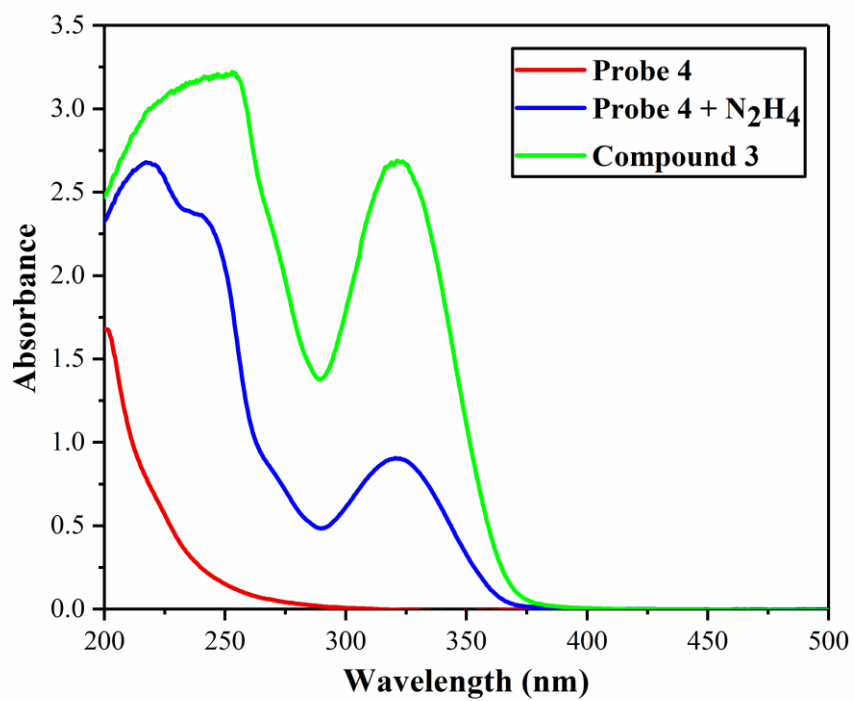

Fig. S9

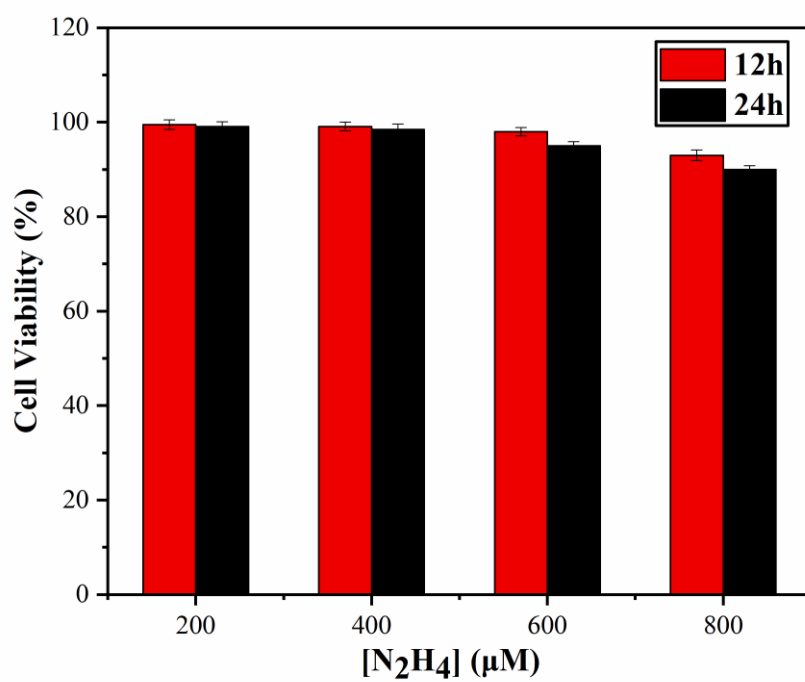

Fig. S10

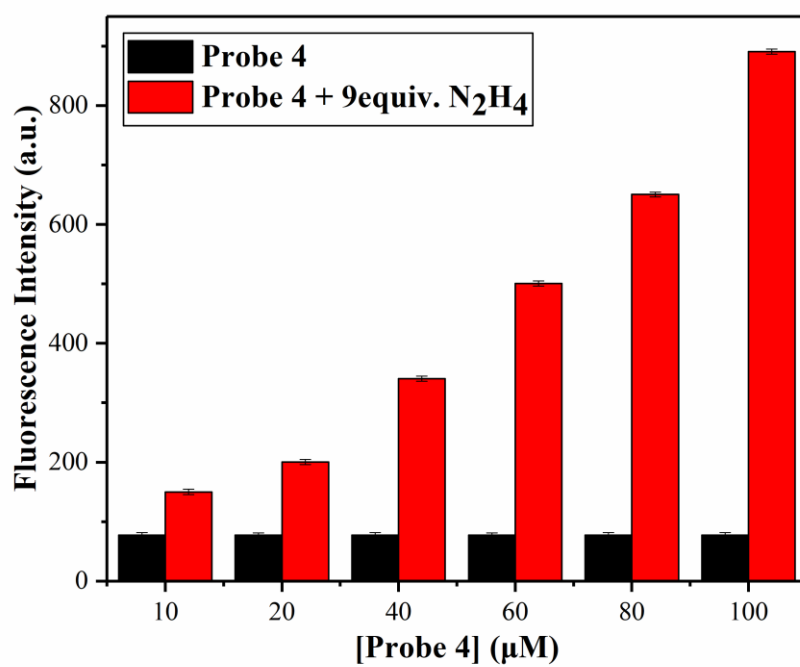

Fig. S11

**Table S1.** Comparison of probe **4** with other hydrazine probes.

| Structures of Probes for N <sub>2</sub> H <sub>4</sub>                              | Detection Mode | Solvent Medium                             | Amounts of Analytes | Limit of Detection | Cell Experiment | Reference No.                                                       |
|-------------------------------------------------------------------------------------|----------------|--------------------------------------------|---------------------|--------------------|-----------------|---------------------------------------------------------------------|
| 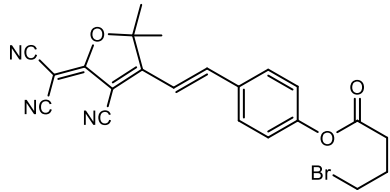   | Turn on        | EtOH/HEPES (1/1)                           | 9                   | 2.9 μM             | No              | Z. Xu et al. Luminescence, 2017, 32(3): 466-470.                    |
|    | Ratiometric    | EtOH/PBS (1/5)                             | 27                  | 5.8 nM             | Yes             | Q. Wu et al. Talanta 195 (2019) 857–864                             |
|   | Turn on        | Acetate buffer (pH 4.5, 10 mM) /DMSO (3:7) | 16                  | Not offered        | No              | Myung Gil Choi et al, Org. Lett., Vol. 13, No. 19, (2011) 5260-5263 |
|  | Ratiometric    | DMSO/H <sub>2</sub> O (7/3)                | 12                  | 0.1 μM             | Yes             | Lei Cui et al, Anal. Chem. 2014, 86, 4611–4617                      |
|  | Turn on        | DMSO/PBS (8/2)                             | 27                  | 0.46 nM            | Yes             | Gongchun Li et al, J Fluoresc. (2017) 27: 323-329                   |
|  | Ratiometric    | DMSO/PBS (2/8)                             | 24                  | 0.96 μM            | Yes             | Chuang Liu et al, Spectrochimica Acta                               |

|                                                                                   |                |                                 |           |                |            |                                                                                                                            |
|-----------------------------------------------------------------------------------|----------------|---------------------------------|-----------|----------------|------------|----------------------------------------------------------------------------------------------------------------------------|
|                                                                                   |                |                                 |           |                |            | <b>Part A:</b><br><b>Molecular and</b><br><b>Biomolecular</b><br><b>Spectroscopy.</b><br><b>212 (2019)</b><br><b>42-47</b> |
| 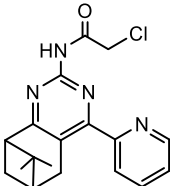 | <b>Turn on</b> | <b>EtOH/PBS</b><br><b>(1/1)</b> | <b>54</b> | <b>1.03 μM</b> | <b>Yes</b> | <b>our work</b>                                                                                                            |
